# Supplementary material for: Identification of potential M2 macrophage-associated diagnostic biomarkers in coronary artery disease
Source: Oxford University Press journal article supplement (doi:10.1042/bsr20221394), 2022-10-12

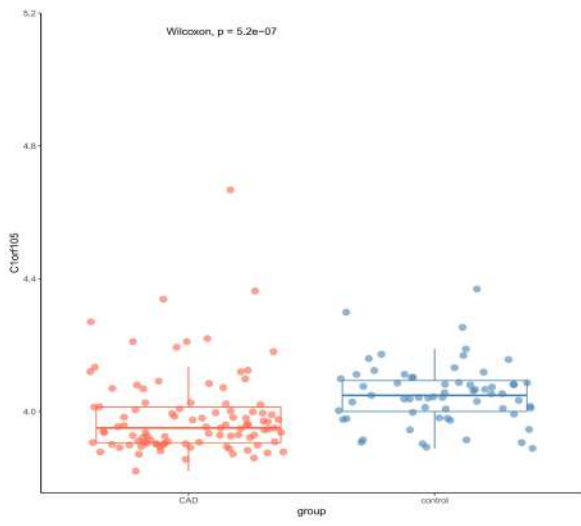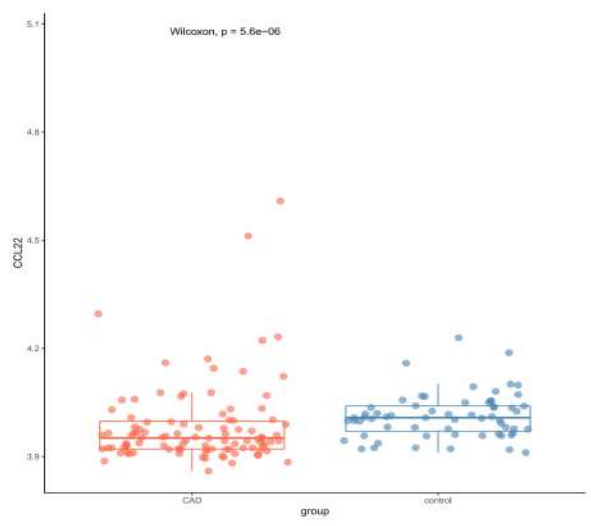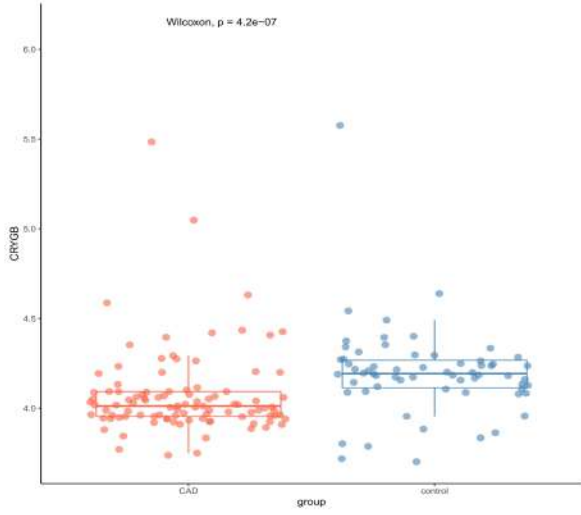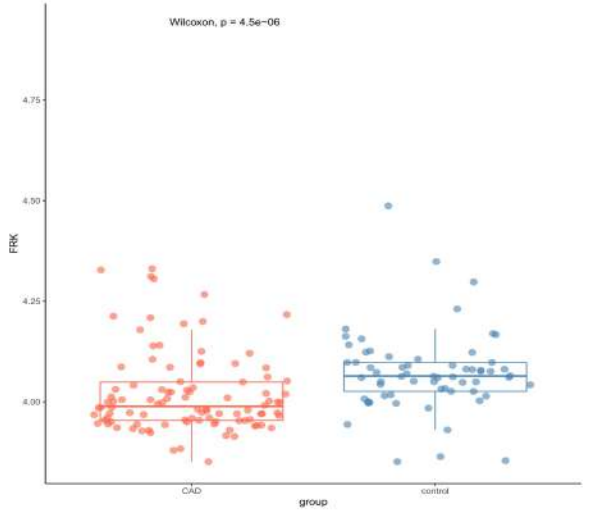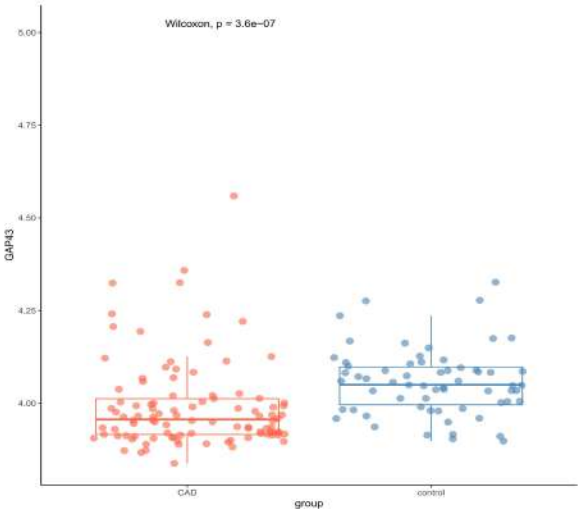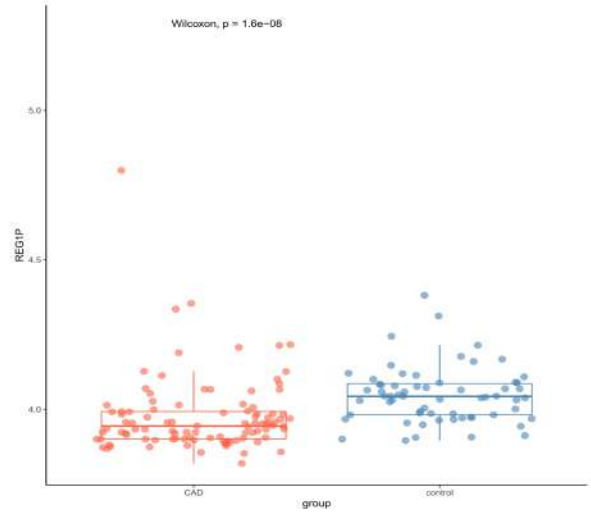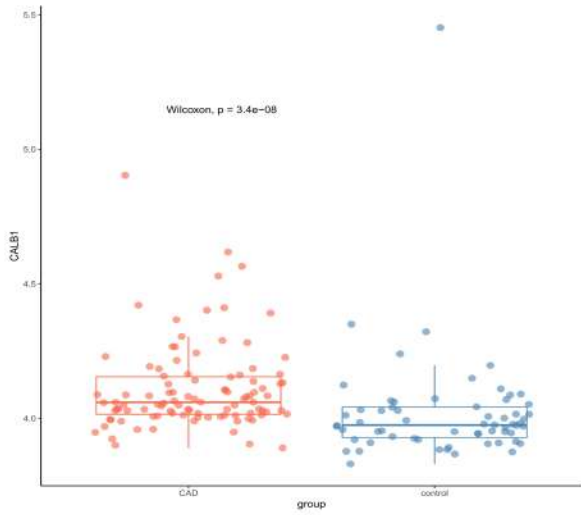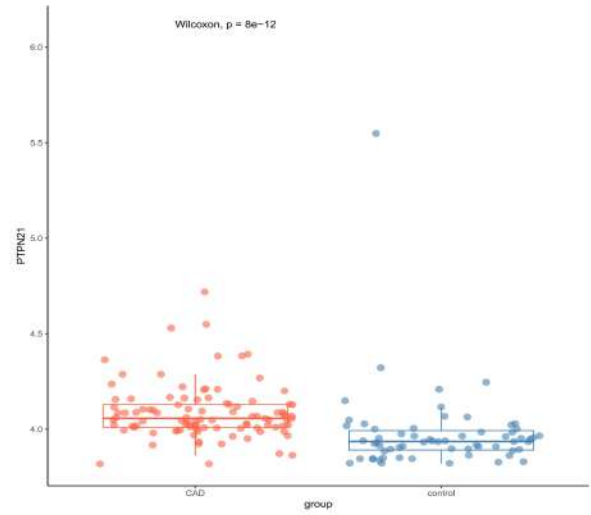

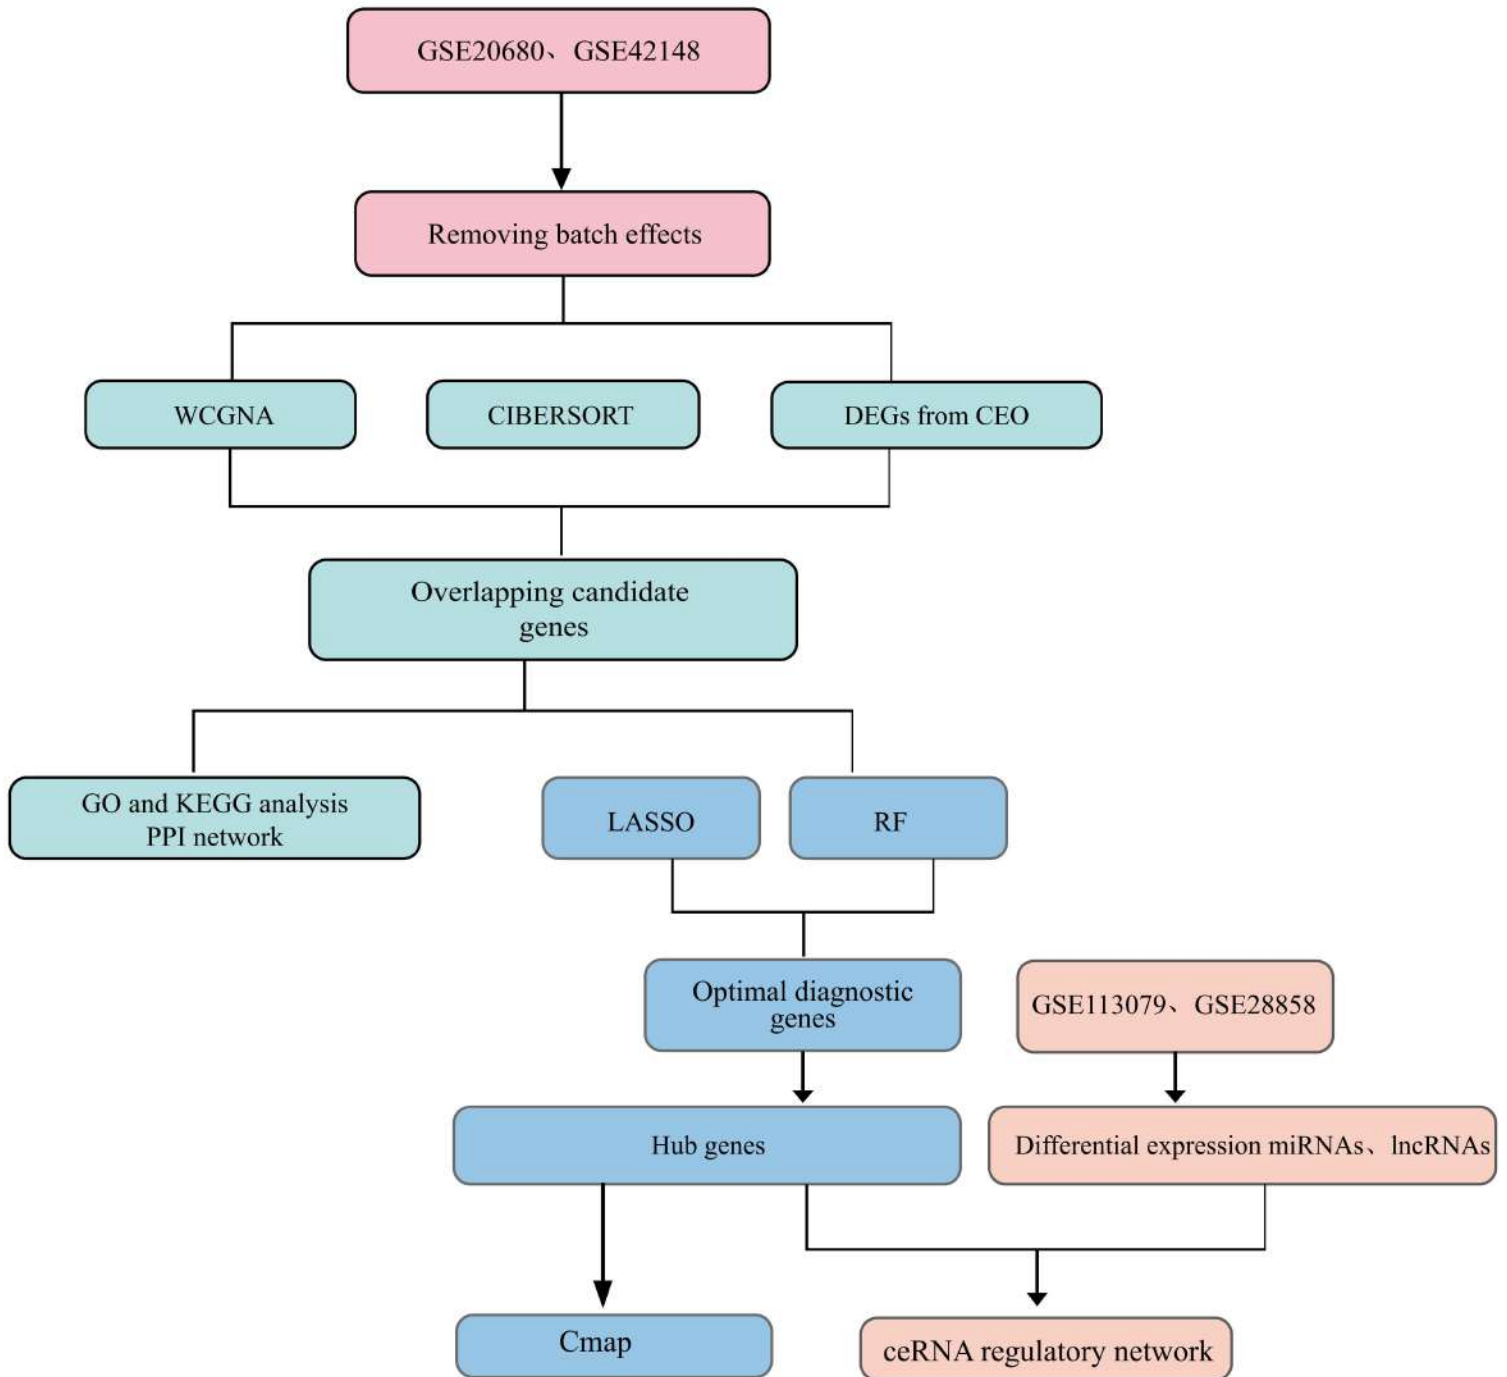

Supplement: bsr-2022-1394_supp.pdf [file bsr-2022-1394_supp.pdf]
